# Supplementary material for: The Thermal and Mechanical Effects of the Tibetan Plateau on Asian Monsoons
Source: Research Square preprint supplement (doi:10.21203/rs.3.rs-6081499/v1), 2025-03-04
Supplement: Supplementary file 1 [file 70f03c36d4d4188f12e0cb55.pdf]

**Extended Data Information**

**The Thermal and Mechanical Effects of the Tibetan Plateau on Asian  
Monsoons**

**Hyein Jeong<sup>1,2</sup>, Hyo-Seok Park<sup>1,2\*</sup> and Kyong-Hwan Seo<sup>3,4</sup>**

*<sup>1</sup>Institute of Ocean and Atmospheric Science (IOAS), Hanyang University, Ansan, South  
Korea*

*<sup>2</sup>Department of Marine Science and Convergence Engineering, Hanyang University, Ansan,  
South Korea*

*<sup>3</sup>Department of Atmospheric Sciences, Pusan National University, Busan, South Korea*

*<sup>4</sup>Institute for Future Earth, Pusan National University, Busan, South Korea*

**Extended Data Table 1. | Configuration of CESM2 experiments.** Summary of experimental setups used to investigate the thermal and mechanical effects of the Tibetan Plateau, including removing sea surface temperature (SST) feedback. **Full-Tibet** represents the control experiment with present-day topography. **No-Tibet** removes the Tibetan Plateau entirely to evaluate the combined effects of thermal and mechanical effects. **Temp-Nudged-Tibet** applies atmospheric temperature nudging over the Tibetan Plateau to isolate the elevated thermal effect. The **\_fixedSST** experiments involve Atmospheric-Only simulations, where SST is fixed to the climatological values derived from 2000s observed SST data, thereby eliminating SST feedback.

| Experiments         | Topography                 | Atmospheric<br>temperature<br>nudging over the<br>Tibetan Plateau | Ocean coupling<br>(SST feedback) |
|---------------------|----------------------------|-------------------------------------------------------------------|----------------------------------|
| Full-Tibet          | Full topography            | OFF                                                               | ON                               |
| No-Tibet            | Tibetan Plateau<br>removed | OFF                                                               | ON                               |
| Temp-Nudged-Tibet   | Full topography            | ON                                                                | ON                               |
| Full-Tibet_fixedSST | Full topography            | OFF                                                               | OFF                              |
| No-Tibet_fixedSST   | Tibetan Plateau<br>removed | OFF                                                               | OFF                              |

## Climatological precipitation during June-July-August

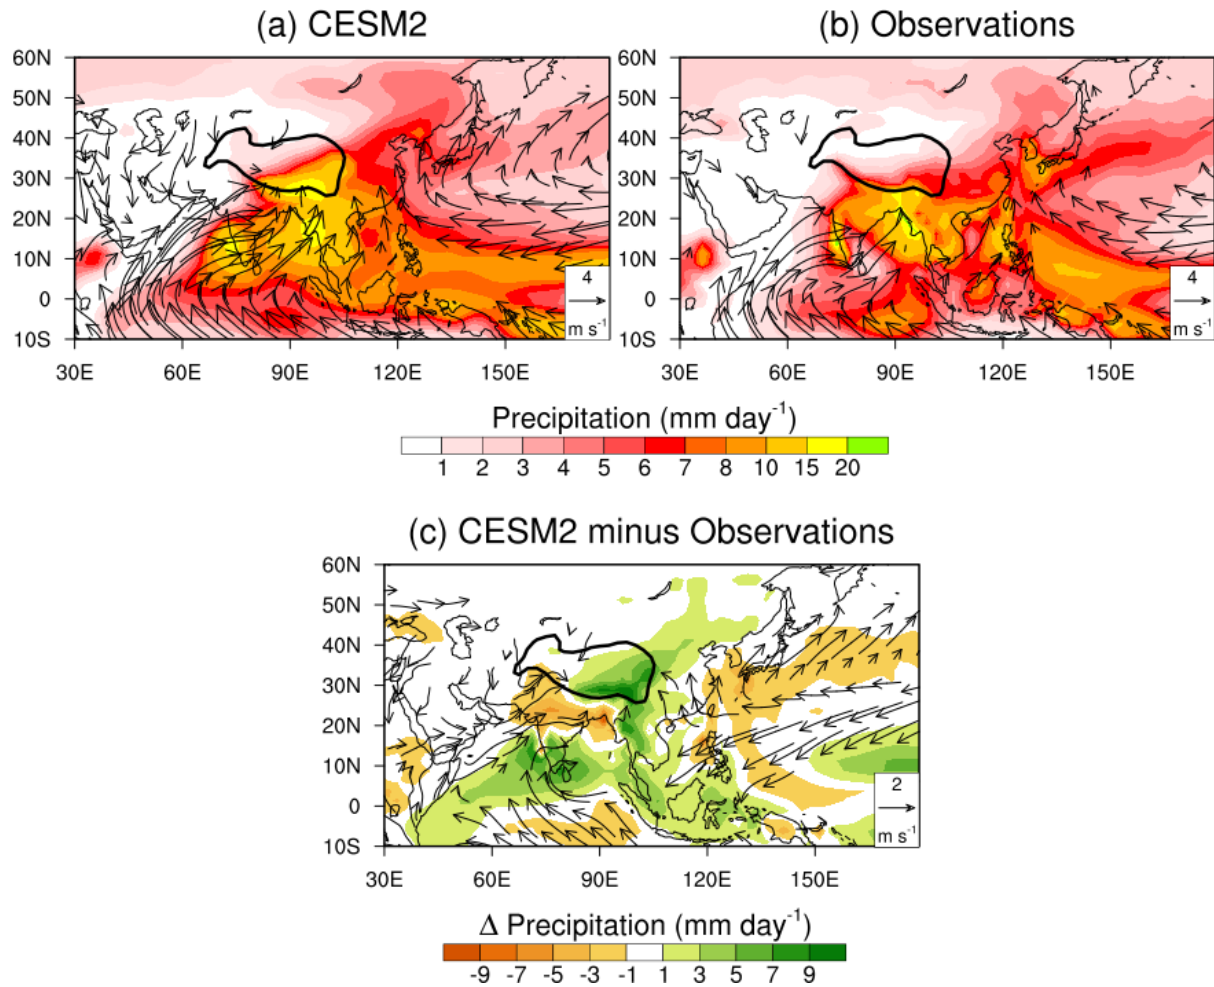

29

30 **Extended Data Fig. 1 | Asian summer precipitation.** Climatological precipitation (shading;  
 31  $\text{mm day}^{-1}$ ) and surface winds (arrows), averaged over June-July-August, for the (a) CESM2  
 32 Control simulation, and (b) GPCP precipitation and surface winds from the ERA5 dataset  
 33 (1979-2022). (c) The difference between the CESM2 simulation and the observations.

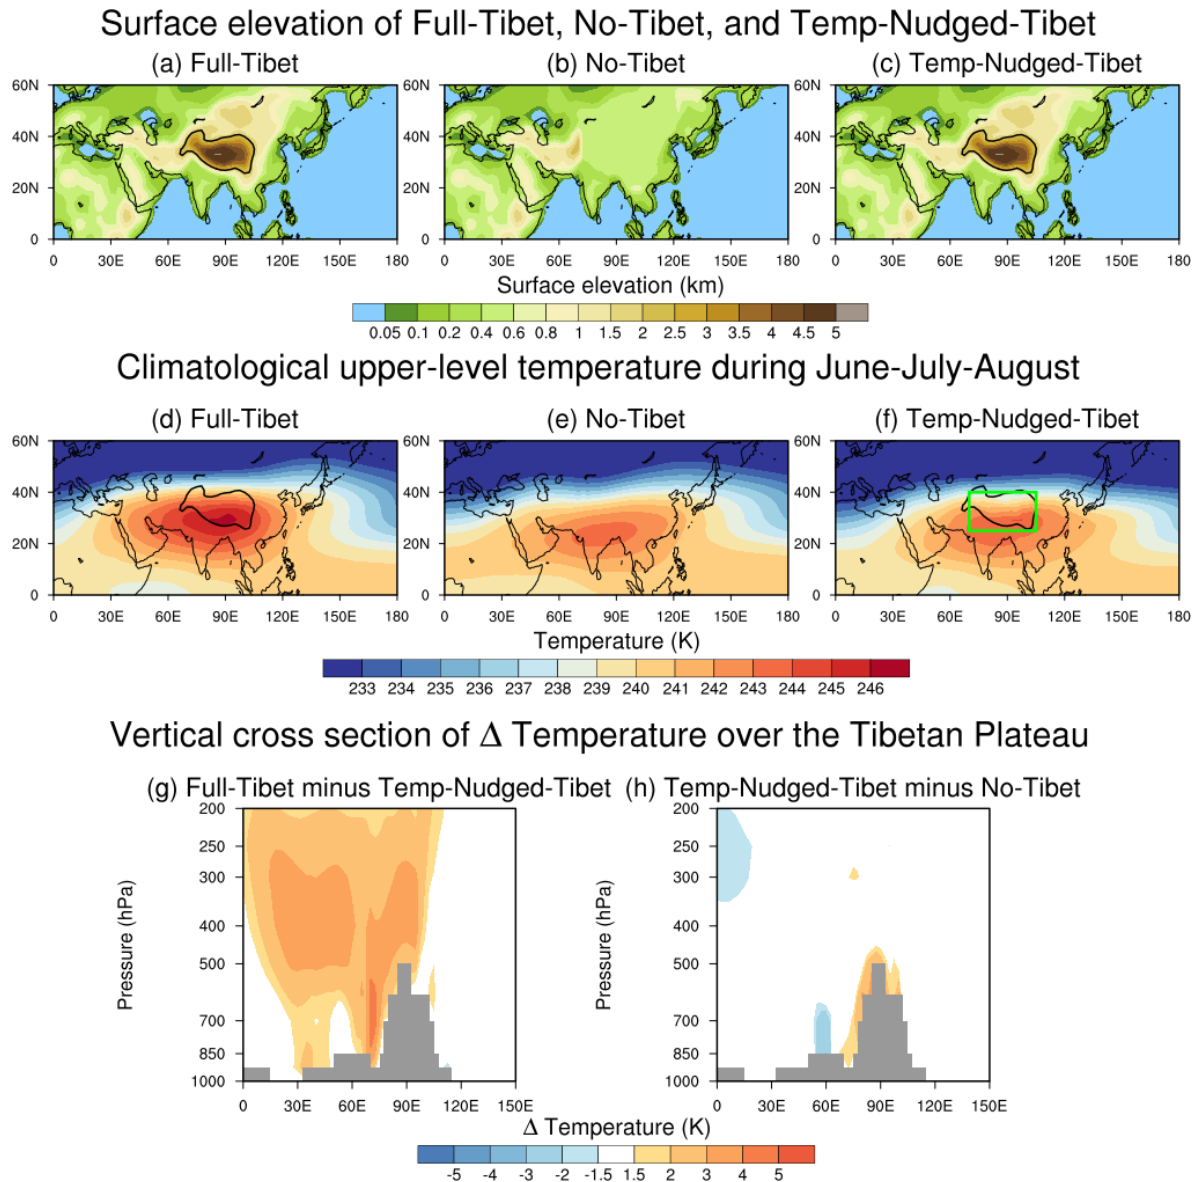

**Extended Data Fig. 2 | Surface elevation and upper troposphere temperature over the Tibetan Plateau.** (a-c) Surface elevation for the (a) Full-Tibet, (b) No-Tibet, and (c) Temp-Nudged-Tibet experiments. In the No-Tibet experiment, the topography over the Tibetan Plateau is reduced to 500 m. (d-f) Climatological upper-level temperature (K), averaged over 175-450 hPa, during June-July-August, for the (d) Full-Tibet, (e) No-Tibet, and (f) Temp-Nudged-Tibet experiments. The green box in (f) indicates the atmospheric temperature nudging area (25°-43°N, 65°-100°E). (g-h) Vertical cross-section of atmospheric temperature changes over the Tibetan Plateau (meridional mean over 28°-35°N): (g) difference between the Full-Tibet and Temp-Nudged-Tibet experiments, and (h) difference between the Temp-Nudged-Tibet and No-Tibet experiments.
